# Supplementary material for: IVF and Early Pregnancy Outcome in Recent COVID 19 Recoverees.
Source: Research Square preprint supplement (doi:10.21203/rs.3.rs-1055952/v1), 2021-11-30
Supplement: Supplementary file 1 [file 1df04d064470126b5b4d77a4.docx]

**Table 1: Cycle outcomes for fresh, post COVID-19 IVF treatment as compared to non- exposed matched cycles**

The table compares several outcome parameters between patients exposed or non-exposed to COVID 19 including gonadotropin dose, length of stimulation, ovarian response in number and quality of oocytes as well as endometrial thickness.

|  | Exposed | Non-exposed | Beta | 95% CI | P value |
| --- | --- | --- | --- | --- | --- |
|  | Mean (∓ SD), Median | |  |  |  |
| Total FSH dose (IU) | 2412.63 (∓1376), 2100 | 2184(∓1028.1), 2025 | 228.6 | -113.2 – 570.5 | 0.19 |
| COH days | 10.12 (∓  2.3),10 | 9.2 (∓  2.2), 9 | 0.9 | 0.001-1.8 | 0.05 |
| Maximal Estradiol (pmol/L) | 9044.24 (∓6341.8) 7273 | 8735.9 (∓5291.8) 7953 | 308.4 | -1797.8-2410.6 | 0.7 |
| Maximal endometrial thickness (mm) | 10.8 (∓  2.5), 0.7 | 10.5 (∓2.8), 10 | 0.04 | -0.35-0.43 | 0.8 |
| Number of aspirated ova | 10.73 (∓  6.9) ,9 | 12.22 (∓9.3) ,10 | -0.13 | -0.36 - 0.1 | 0.3 |
| Number of fertilized ova | 6.8 (∓4.5), 6 | 6.7 (∓5.3), 6 | 0.02 | -0.3 -0.31 | 0.9 |
| Number of cleavage stage embryos | 6.56 (∓ 4.4),6 | 6.0 (∓ 4.4) ,5 | 0.09 | -0.18-0.36 | 0.5 |
| Number of top-quality embryos | 4.57 (∓3.7), 3 | 3.88 (∓ 2.8), 3 | 0.17 | -0.16 -0.5 | 0.3 |

**Table 2: sperm parameters of exposed male partners: pre and post- exposure to Covid-19**

The table compares sperm quality parameters in men before and shortly after contracting COVID 19.

| N=11 | Pre-concentration  (mil/ml) | Post-concentration (mil/ml) | Pre-motility (%) | Post-motility (%) |
| --- | --- | --- | --- | --- |
| Mean | 19.4 | 12.7 | 32.3 | 22.5 |
| **Median** | **16.5** | **6.27** | **24.5** | **25.0** |
| SD | 18.3 | 16.07 | 29.7 | 23.7 |
| P value (for ln values) | **0.008** | | 0.2 | |

**Table 3:** **Pregnancy outcomes of COVID-19 exposed versus non-exposed IVF conceptions**.

The table compares patients that conceived following IVF treatment that had were either exposed or non-exposed to COVID 19, analyzing the rate of hospitalization, emergency room visits, medical complications and early pregnancy loss.

| **Total pregnant patient contacted (N=189)** | **Exposed to SARS–CoV-2**  **(N=30)** | **Not exposed to SARS–CoV-2**  **(N=159)** | **P-VALUE** |
| --- | --- | --- | --- |
| Hospitalizations | 2/30 (6.66%) | 12/159 (7.5%) | 0.63 |
| Pregnancy complications (other than pregnancy loss) | 4/30  (13.3%) | 18/159  (11.3%) | 0.46 |
| ER visits | 7/30 (23.3%) | 24/159  (15.1%) | 0.18 |
| **Pregnancy loss** | **7/30 (23.3%)** | **41/159 (25.8%)** | **0.48** |
